# Supplementary material for: The Fischer–Tropsch reaction in the aqueous phase over rhodium catalysts: a promising route to selective synthesis and separation of oxygenates and hydrocarbons
Source: Royal Society of Chemistry journal article supplement (doi:10.1039/c9cc09026f), 2019-11-26
Supplement: c9cc09026f1.pdf [file c9cc09026f1.pdf]

**Electronic Supplementary Information (ESI) for**

*“Fischer-Tropsch Reaction in the Aqueous Phase over Rhodium Catalysts: A  
Promising Route to Selective Synthesis and Separation of Oxygenates and  
Hydrocarbons”*

*Aleksandra S. Peregudova, Alan J. Barrios, Vitaly V. Ordonsky\*, Nataliya E. Borisova and Andrei  
Y. Khodakov\**

## Experimental

### *Catalyst synthesis*

#### *Preparation of the Rh/SiO<sub>2</sub> catalysts*

The Rh(10%)/SiO<sub>2</sub> and Rh(20%)/SiO<sub>2</sub> catalysts were prepared by incipient wetness impregnation of commercial silica with a water solution of rhodium trichloride hydrate (Acros Organics), using a weight loading of 10% and 20%. The impregnated sample was dried in an oven at 80°C 12 h followed by calcination at 400°C for 4 h.

#### *Preparation of Rh non-supported nanoparticles*

The Rh nanoparticles were prepared using the w/o microemulsion method. Initially, 2.5 g of CTAB (cetyltrimethylammonium bromide) was dispersed in 3.0 g of hexanol with stirring. Afterward, 4.5 g of water containing 0.5 M RhCl<sub>3</sub>·H<sub>2</sub>O was added. An optically transparent microemulsion system (M1) was obtained. A separate microemulsion (M2) was prepared by mixing 0.113 g NaBH<sub>4</sub> in 4.5 g of water, 2.5 g of CTAB, and 3.0 g of hexanol. Microemulsion M2 was then added drop by drop to microemulsion M1. The resulting microemulsion was then stirred for 1 h. The prepared catalyst with Rh nanoparticles is denoted as Rh-Nps. The prepared sample was separated by centrifugation and subsequently washed with water. After, the prepared Rh nanoparticles were dried at 80 °C for 12 h.

#### *Synthesis of rhodium complex*

[LRhCl(PPh<sub>3</sub>)]. Ligand N,N'-propanebis(3-phormyl-5-tert-butyl-salicylalimine) (L) (0.11 g, 1.0 mmol) dissolved in hot dry methanol (10 mL) was added to a methanolic solution (10 mL) of Rh(PPh<sub>3</sub>)<sub>3</sub>Cl (0.23 g, 1.0 mmol), (Ph = phenyl) dropwise with constant stirring. The solution obtained was stirred for 10 min. A solution of TEA (0.10 g, 1.0 mmol) in 10 mL of methanol was added to the reaction mixture dropwise. A brown reaction mixture formed and was stirred under reflux for 10 h.

The solvent was distilled off under vacuum, the orange residue crystallized and washed with ethyl ether ( $3 \times 5$  mL). Yield 0.34 g, 38% based on L, m.p.: 190-200 °C. The complex structure was confirmed by FT-IR,  $^1\text{H}$ - NMR and elemental analysis

FT-IR, ( $\nu$ ,  $\text{cm}^{-1}$ ) (KBr Disc): 3056br, 2955s, 1669s, 1623s, 1560m, 1361s, 1233w (br, broad; s, sharp; m, medium; w, weak).

$^1\text{H}$  NMR (600 MHz,  $\text{CDCl}_3$ ) :  $\delta$  = 10.55 (CHO, 2H) ; 8.45-8.35 (CH, 2H) ; 7.95-7.05 (ArH, 4H) ; 4.18 ( $\text{CH}_2$ , 4H) ; 3.49-3.40 ( $\text{CH}_2$ , 2H) ; 1.53-1.05 ( $\text{CH}_3$ , 18H) and 7.82-7.40 ( $\text{P}(\text{C}_6\text{H}_5)_3$ ).

Elemental Analysis Data. Calculated. (%) for  $\text{C}_{45}\text{H}_{34}\text{ClN}_2\text{O}_4\text{PRh}$ : C, 63.42; H, 5.91; N, 3.29.

Found: C, 63.56; H, 5.80; N, 3.20.

#### *Preparation of Rh-complex/ $\text{SiO}_2$ catalyst*

The cx-Rh(10%)/ $\text{SiO}_2$  catalyst was prepared by impregnation method of commercial silica with a rhodium complex ( $[\text{LRhCl}(\text{CH}_3\text{OH})]$ ), in ethanol, using a weight loading of 10%. After impregnation the sample was dried in an oven at 80°C 12 h and calcined at 400°C for 4 h. The TGA data suggest (**Fig. S3**) that catalyst calcination at 400°C for 4 h results in decomposition of the Rh Schiff complex.

#### *Catalyst characterization*

The catalyst reducibility was studied using temperature-programmed reduction (TPR) system with an Autochem II (Micrometrics) apparatus. The samples were reduced under a flow of 5 %  $\text{H}_2$  in argon (50 mL/min) and heated up to 800 °C at a rate of 5°C/min.

The transmission electron microscopy (TEM) analysis were carried out on a Tecnai instrument equipped with a LaB6 crystal operated at 200 kV. Before the analysis, the samples were dispersed by ultrasound in ethanol for 5 min, and two drops of the suspension was deposited onto a carbon membrane on a 300 mesh copper grid.

The X-ray diffraction (XRD) spectra were made with a D8 Advance diffractometer equipped with an energy dispersive type detector and a monochromatic  $\text{CuK}\alpha$  radiation source (40 kV and 30 mA). The scan range was set to  $2\Theta = 5\text{-}80^\circ$  with a step size of  $0.02^\circ$  and a step time of 0.5 s.

### *Catalytic testing*

The catalytic experiments were carried out in a 25 ml stirred stainless steel autoclave operating in a batch mode. For FTS, about 0,1-0,3 g of freshly prepared catalyst was dispersed into 5 ml of deionized water. The catalyst was reduced at  $170^\circ\text{C}$  with 2.0 MPa of hydrogen for 2 h. After cooling to room temperature, hydrogen was released and 3.0 MPa syngas was added.  $\text{H}_2/\text{CO}$  mole ratio equal to 2:1. The autoclave was then heated to  $180\text{-}200^\circ\text{C}$  with 500 rpm stirring for 12-24 h.

The products of aqueous Fischer-Tropsch synthesis were analysed using well-defined methods. Permanent gases including  $\text{H}_2$ ,  $\text{CO}$ ,  $\text{CO}_2$ ,  $\text{CH}_4$  and  $\text{N}_2$  (as the internal standard) were separated and quantified using Bruker 465-GC. Gaseous  $\text{C}_1\text{-C}_7$  hydrocarbons were analysed with Micropacked GC column and flame ionization detector (FID). Liquid hydrocarbons and oxygenates were analysed with BR-Q PLOT capillary column and FID using dioxane as the intern standard.

Conversions of  $\text{CO}$  (mol %) and product selectivity (mol %) in the experiments were defined as follows:

Conversion (mol %) = (moles of  $\text{CO}$  reacted)/(moles of initial  $\text{CO}$ )  $\cdot 100$ ;

Selectivity (mol %) = (moles of C atoms of product produced)/(moles of  $\text{CO}$  reacted)  $\cdot 100$ .

The surface-specific activity (turnover frequency, TOF) for Rh catalysts in aqueous phase FT synthesis was calculated from the rate of moles of  $\text{CO}$  conversion divided by the number of surface Rh atoms:

$$TOF = \frac{N_{CO(0)} * X_{CO}}{t * D_{Rh} * N_R}$$

where  $N_{CO(0)}$  is initial number of moles of CO in the reactor,  $X_{CO}$  is the CO conversion,  $t$  is the reaction time,  $N_{Rh}$  is the amount of Rh in the reactor,  $D_{Rh}$  is the Rh dispersion. The rhodium dispersion ( $D_{Rh}$ ) was calculated assuming spherical shapes by using the following formula [1]:

$$D_{Rh} = 6 \frac{V_a}{S_a} * d_{vs}^{-1}$$

where  $V_a$  is the effective volume per metal atom (which can be derived from the molar volume of the solids),  $V_s$  the effective average surface area occupied by a metal atom in the surface, and  $d_{vs}$  the mean particle size (Sauter mean diameter,  $d_{3,2}$ ).

The external diffusion limitation in a batch reactor were excluded by conducting the experiments with different stirring rates. No effect on the conversion was observed. The internal diffusion limitations were excluded using the Weisz-Prater criterion.[2,3]

$$N_{W-P} = \frac{R r_p^2}{D_{eff} C_s} \leq 0.3$$

where  $R$  = observed reaction rate ( $\text{mol g}^{-1} \text{s}^{-1}$ ),  $r_p$ = catalyst particle radius (cm),  $D_{eff}$  = effective diffusivity ( $\text{cm}^2 \text{s}^{-1}$ ),  $C_s$  = gas concentration at the external surface of the catalyst ( $\text{mol cm}^{-3}$ ). We considered the CO conversion of 83% and reaction time of 24 h. The CO pressure was 10 bar. The catalyst particle size was of 0.010 - 0.015 cm.  $C_s$  and  $D_{eff}$  were  $4.45 \times 10^{-4} \text{ mol/cm}^3$  and  $1.4 \times 10^{-4} \text{ cm}^2 \text{s}^{-1}$  [4], respectively. The  $N_{W-P}$  value is calculated to be  $4.7 \times 10^{-4}$ , which is much lower than 0.3.

**Table S1.** Detailed composition of hydrocarbons and oxygenates produced over silica supported catalysts (T = 200°C, p (CO) = 10 bar, p (H<sub>2</sub>) = 20 bar, t = 24 h, stirring rate = 500 rpm)

|                                                     | <i>T</i> , °C | <i>CO</i> conversion, % | <i>CO</i> <sub>2</sub> selectivity, % | <i>Carbon selectivity</i> , %<br>( <i>CO</i> <sub>2</sub> free) |                                                               |                                                                |                                                                  |                                                               |                                                                |                                                                  |                        |                                                               |
|-----------------------------------------------------|---------------|-------------------------|---------------------------------------|-----------------------------------------------------------------|---------------------------------------------------------------|----------------------------------------------------------------|------------------------------------------------------------------|---------------------------------------------------------------|----------------------------------------------------------------|------------------------------------------------------------------|------------------------|---------------------------------------------------------------|
|                                                     |               |                         |                                       | <i>CH</i> <sub>4</sub>                                          | <i>C</i> <sub>2</sub> - <i>C</i> <sub>4</sub><br><i>total</i> | <i>C</i> <sub>2</sub> - <i>C</i> <sub>4</sub><br><i>olefin</i> | <i>C</i> <sub>2</sub> - <i>C</i> <sub>4</sub><br><i>paraffin</i> | <i>C</i> <sub>5</sub> - <i>C</i> <sub>7</sub><br><i>total</i> | <i>C</i> <sub>5</sub> - <i>C</i> <sub>7</sub><br><i>olefin</i> | <i>C</i> <sub>5</sub> - <i>C</i> <sub>7</sub><br><i>paraffin</i> | <i>Olefin/paraffin</i> | <i>C</i> <sub>1</sub> - <i>C</i> <sub>4</sub><br><i>oxyg.</i> |
| <i>Schiff</i> – <i>Rh</i> - <i>SiO</i> <sub>2</sub> | 200           | 86                      | 36                                    | 14.4                                                            | 41.6                                                          | 10.5                                                           | 30.1                                                             | 7.6                                                           | 3.3                                                            | 4.7                                                              | 0.40                   | 31.5                                                          |
| <i>Schiff</i> – <i>Rh</i> - <i>SiO</i> <sub>2</sub> | 195           | 72                      | 30                                    | 9.4                                                             | 50.3                                                          | 10.0                                                           | 40.3                                                             | 9.6                                                           | 4.0                                                            | 5.6                                                              | 0.31                   | 25.9                                                          |
| <i>Rh</i> - <i>SiO</i> <sub>2</sub>                 | 200           | 72                      | 62                                    | 33.6                                                            | 35.8                                                          | 6.5                                                            | 29.3                                                             | 8.9                                                           | 3.7                                                            | 5.2                                                              | 0.30                   | 13.9                                                          |
| <i>Rh</i> - <i>SiO</i> <sub>2</sub>                 | 180           | 46                      | 34                                    | 28.2                                                            | 31.1                                                          | 5.4                                                            | 25.7                                                             | 19.2                                                          | 2.7                                                            | 16.5                                                             | 0.19                   | 9.0                                                           |
| 20% <i>Rh</i> - <i>SiO</i> <sub>2</sub>             | 200           | 60                      | 38                                    | 29.3                                                            | 38.8                                                          | 3.7                                                            | 35.1                                                             | 10.9                                                          | 1.9                                                            | 9.0                                                              | 0.13                   | 12.1                                                          |
| <i>Schiff</i> - <i>Rh</i>                           | 200           | 0                       | -                                     | -                                                               | -                                                             | -                                                              | -                                                                | -                                                             | -                                                              | -                                                                | -                      | -                                                             |
| <i>Rh</i> - <i>NPs</i>                              | 200           | 71                      | 36                                    | 17.0                                                            | 58.4                                                          | 11.1                                                           | 47.3                                                             | 12.7                                                          | 4.0                                                            | 8.7                                                              | 0.27                   | 2.2                                                           |

## TPR

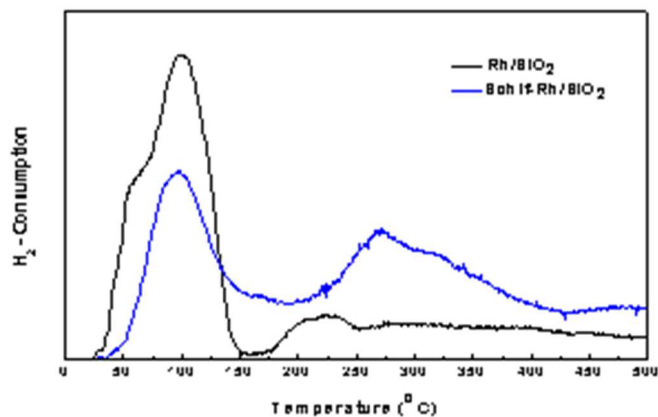

**Fig. S1.** TPR profile of Rh/SiO<sub>2</sub> and Schiff-Rh/SiO<sub>2</sub> catalysts, the metal loading is 10%.

Rh is reduced between 50 and 150°C. Broad high temperature peaks in the profile of Schiff-Rh/SiO<sub>2</sub> are related to removal of carbon species, which remain after decomposition of the Schiff complex.

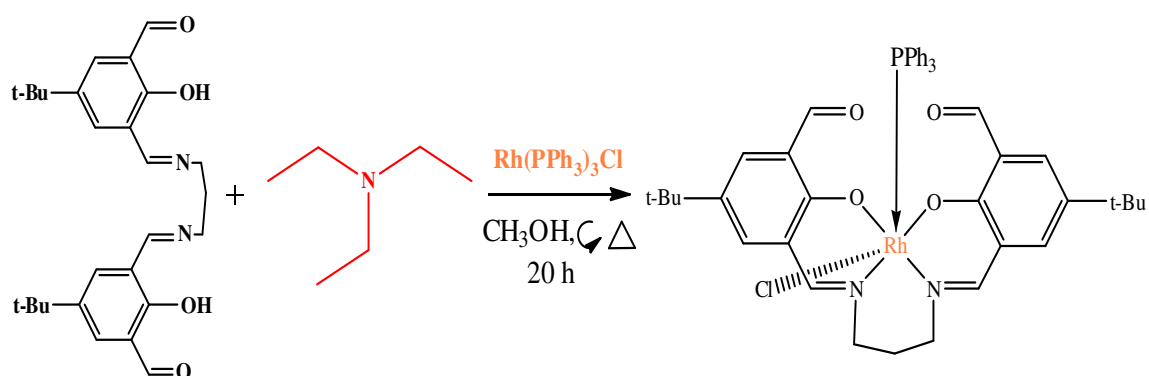

**Fig. S2.** The synthesis of the rhodium complex.

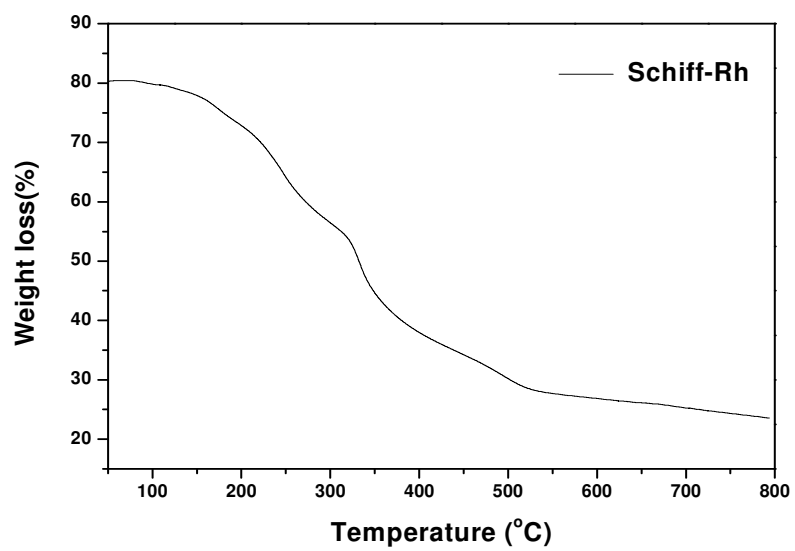

**Fig. S3.** TGA curve of the Rh Schiff base complex.



## XRD

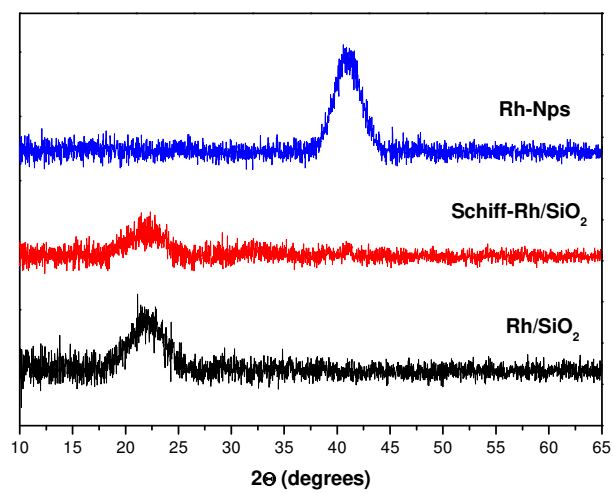

**Fig. S4.** XRD patterns of the Schiff-Rh/SiO<sub>2</sub>, Rh/SiO<sub>2</sub>, Rh-Nps catalysts.

## TEM

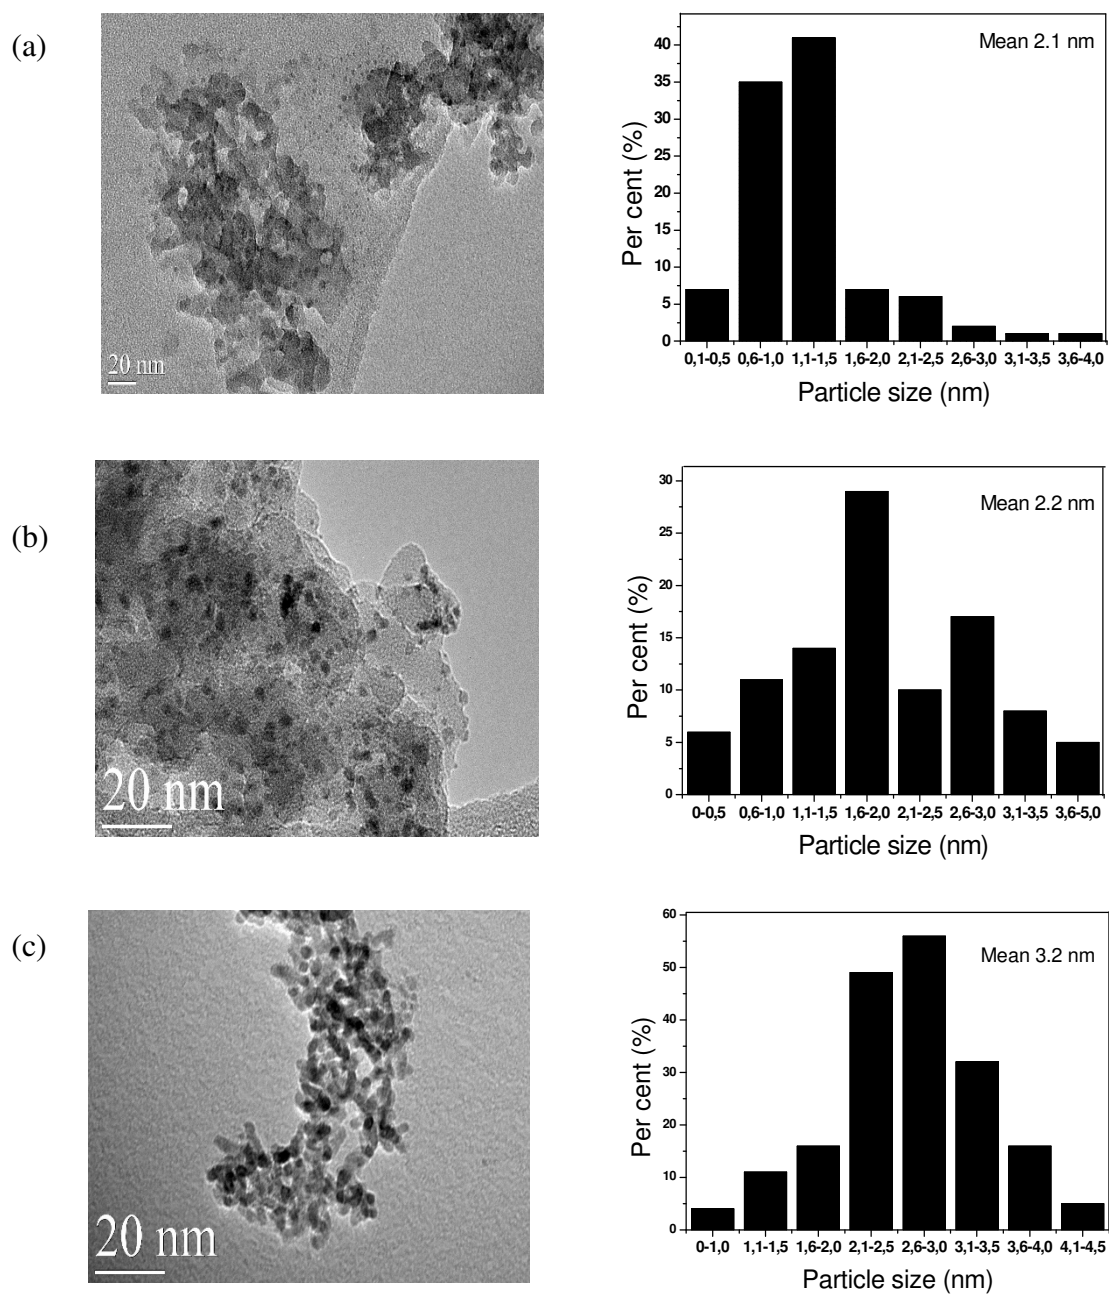

**Fig. S5.** TEM micrographs and Rh particle size distribution: (a) Schiff-Rh/SiO<sub>2</sub>, (b) Rh/SiO<sub>2</sub> and (c) Rh-NPs.

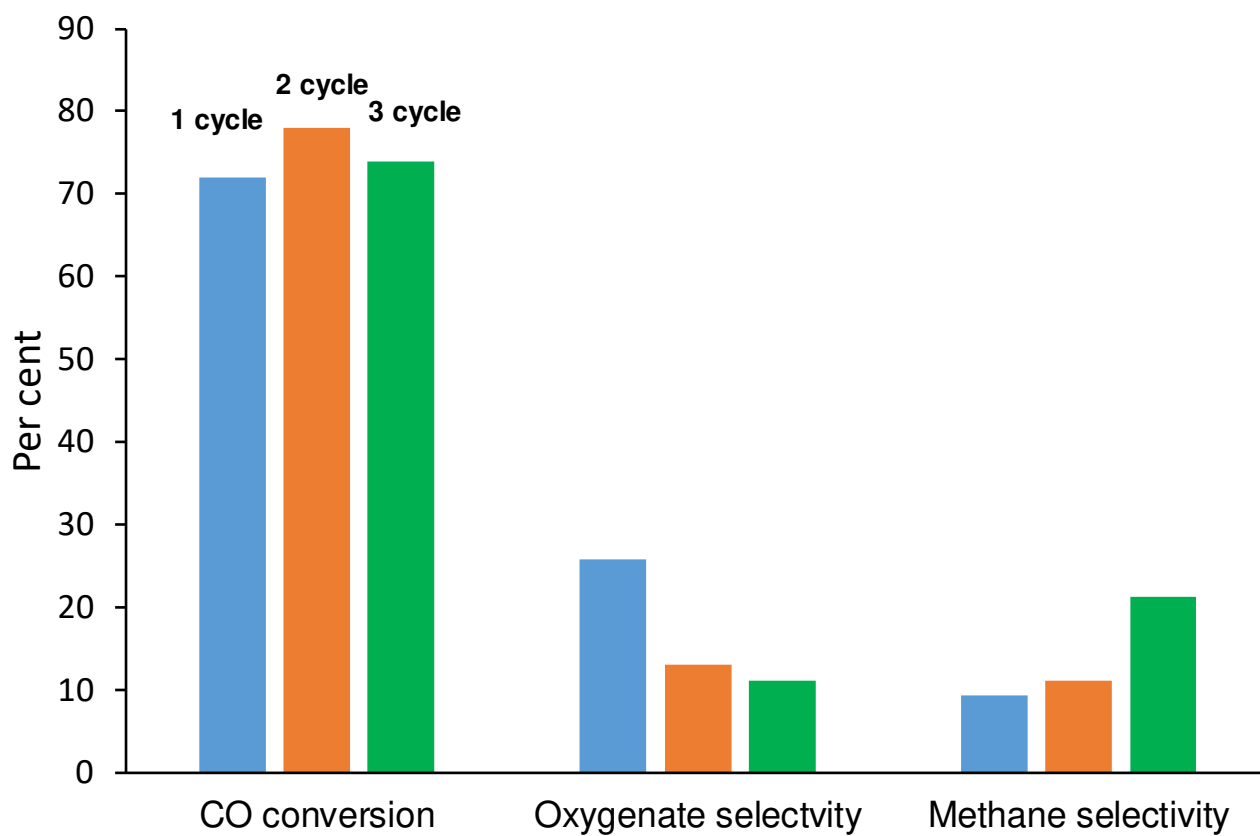

**Fig. S6.** Catalytic performance of Schiff – Rh - SiO<sub>2</sub> in 3 consecutive reaction cycles. Conditions: T=195° C, p (CO) = 10 bar, p (H<sub>2</sub>) = 20 bar, t = 24 h, stirring rate = 500 rpm.

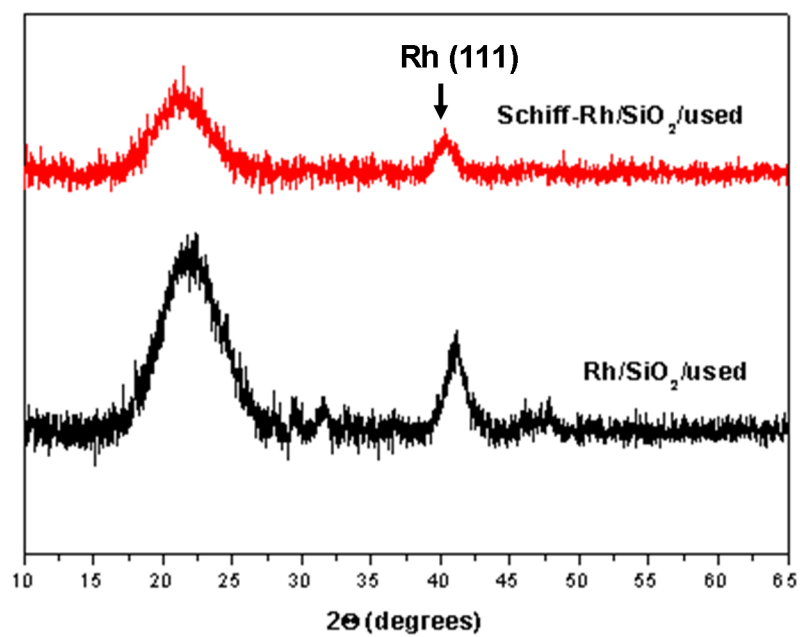

**Fig. S7.** XRD patterns of the Schiff-Rh/SiO<sub>2</sub> and Rh/SiO<sub>2</sub> catalysts after reaction.

## Reference

- [1] J.J.F. Scholten, A.P. Pijpers, A.M.L. Hustings, Surface Characterization of Supported and Nonsupported Hydrogenation Catalysts, *Catal. Rev.* 27 (1985) 151–206. doi:10.1080/01614948509342359.
- [2] D.E. Mears, Tests for Transport Limitations in Experimental Catalytic Reactors, *Ind. Eng. Chem. Process Des. Dev.* 10 (1971) 541–547. doi:10.1021/i260040a020.
- [3] P.B. Weisz, C.D. Prater, Interpretation of Measurements in Experimental Catalysis, in: 1954: pp. 143–196. doi:10.1016/S0360-0564(08)60390-9.
- [4] D. Vervloet, F. Kapteijn, J. Nijenhuis, J.R. van Ommen, Fischer–Tropsch reaction–diffusion in a cobalt catalyst particle: aspects of activity and selectivity for a variable chain growth probability, *Catal. Sci. Technol.* 2 (2012) 1221. doi:10.1039/c2cy20060k.
